# Supplementary material for: Multisystem inflammatory syndrome in children during the coronavirus disease 2019 (COVID-19) pandemic: a systematic review of published case studies
Source: PubMed Central journal article supplement — Transl Pediatr. 2021 Jan;10(1):121–35. doi: 10.21037/tp-20-188 (PMC7882293; doi:10.21037/tp-20-188), 2021-01
Supplement: tp-10-01-121-supplementary.pdf [file tp-10-01-121-supplementary.pdf]

## Supplementary material 1 Search strategy

### PubMed

- #1. "COVID-19" [Supplementary Concept]
- #2. "severe acute respiratory syndrome coronavirus 2" [Supplementary Concept]
- #3. "2019-CoV"[Title/Abstract]
- #4. "2019-nCoV"[Title/Abstract]
- #5. "Novel CoV"[Title/Abstract]
- #6. "COVID19"[Title/Abstract]
- #7. "coronavirus disease 2019"[Title/Abstract]
- #8. "coronavirus disease-19"[Title/Abstract]
- #9. "2019-novel coronavirus"[Title/Abstract]
- #10. "Novel coronavirus"[Title/Abstract]
- #11. "SARS-COV-2"[Title/Abstract]
- #12. "COVID-19"[Title/Abstract]
- #13. #1-#12/ OR
- #14. "pediatric multisystem inflammatory disease, COVID-19 related" [Supplementary Concept]
- #15. "Kawasaki disease"[Title/Abstract]
- #16. "KD-like syndrome"[Title/Abstract]
- #17. "KD-like disease"[Title/Abstract]
- #18. "Kawasaki-like syndrome"[Title/Abstract]
- #19. "Kawasaki-like disease"[Title/Abstract]
- #20. "PMIS"[Title/Abstract]
- #21. "PIMS"[Title/Abstract]
- #22. "MIS-C"[Title/Abstract]
- #23. "multisystem inflammatory syndrome in children"[Title/Abstract]
- #24. #14-#23/ OR
- #25. #13 AND #24

### Web of Science

- #1. TOPIC: "COVID-19"
- #2. TOPIC: "severe acute respiratory syndrome coronavirus 2"
- #3. TOPIC: "2019-CoV"
- #4. TOPIC: "2019-nCoV"
- #5. TOPIC: "Novel CoV"
- #6. TOPIC: "COVID19"
- #7. TOPIC: "coronavirus disease 2019"
- #8. TOPIC: "coronavirus disease-19"
- #9. TOPIC: "2019-novel coronavirus"
- #10. TOPIC: "Novel coronavirus"
- #11. TOPIC: "SARS-COV-2"
- #12. #1-#11/ OR

- #13. TOPIC: "Kawasaki disease"
- #14. TOPIC: "KD-like syndrome"
- #15. TOPIC: "KD-like disease"
- #16. TOPIC: "Kawasaki-like syndrome"
- #17. TOPIC: "Kawasaki-like disease"
- #18. TOPIC: "PMIS"
- #19. TOPIC: "PIMS"
- #20. TOPIC: "MIS-C"
- #21. TOPIC: "multisystem inflammatory syndrome in children"
- #22. #13-#21/ OR
- #23. #12 AND #22

### **CNKI**

- #1. "新型冠状病毒"[主题]
- #2. "COVID-19"[主题]
- #3. "COVID 19"[主题]
- #4. "2019-nCoV"[主题]
- #5. "2019-CoV"[主题]
- #6. "SARS-CoV-2"[主题]
- #7. #1-#6/ OR
- #8. "儿童多系统炎症综合征"[主题]
- #9. "儿童多系统炎性综合征"[主题]
- #10. "儿科多系统炎症综合征"[主题]
- #11. "儿科多系统炎性综合征"[主题]
- #12. "川崎样疾病"[主题]
- #13. "川崎样综合征"[主题]
- #14. "川崎病"[主题]
- #15. "MIS-C"[主题]
- #16. #8-#15/ OR
- #17. #7 AND #16

### **CBM**

- #1. "新型冠状病毒"[常用字段:智能]
- #2. "COVID-19"[常用字段:智能]
- #3. "COVID"[常用字段:智能]
- #4. "2019-nCoV"[常用字段:智能]
- #5. "2019-CoV"[常用字段:智能]
- #6. "SARS-CoV-2"[常用字段:智能]
- #7. #1-#6/ OR
- #8. "儿童多系统炎症综合征"[常用字段:智能]
- #9. "儿童多系统炎性综合征"[常用字段:智能]
- #10. "儿科多系统炎症综合征"[常用字段:智能]

- #11. "儿科多系统炎性综合征"[常用字段:智能]
- #12. "川崎样疾病"[常用字段:智能]
- #13. "川崎样综合征"[常用字段:智能]
- #14. "川崎病"[常用字段:智能]
- #15. "MIS-C"[常用字段:智能]
- #16. #8-#15/ OR
- #17. #7 AND #16
